# Supplementary material
Source: PubMed Central journal article supplement (PMC4042741)
Supplement: JCM.00286-14_zjm999093459so1.pdf [file JCM.00286-14_zjm999093459so1.pdf]

**Supplementary Table 1 – Frequency of HPV genotypes identified using 3 methodologies (bold = high risk)**

| HPV genotype                                                | ORS pre-abrasion<br>N (frequency of<br>multiple infections) | ORS post-abrasion<br>N (frequency of<br>multiple infections) | Toothbrush<br>N (frequency of<br>multiple infections) |
|-------------------------------------------------------------|-------------------------------------------------------------|--------------------------------------------------------------|-------------------------------------------------------|
| 6                                                           | 1 (1)                                                       | 1                                                            | 2                                                     |
| 11                                                          | 2                                                           | 1                                                            | 1                                                     |
| <b>16</b>                                                   | <b>7 (1)</b>                                                | <b>6</b>                                                     | <b>5</b>                                              |
| <b>18</b>                                                   | <b>4</b>                                                    | <b>1</b>                                                     | <b>1</b>                                              |
| <b>31</b>                                                   | <b>2</b>                                                    | <b>2</b>                                                     | <b>3</b>                                              |
| <b>33</b>                                                   | <b>2</b>                                                    | <b>0</b>                                                     | <b>0</b>                                              |
| <b>35</b>                                                   | <b>4</b>                                                    | <b>1</b>                                                     | <b>2</b>                                              |
| <b>39</b>                                                   | <b>0</b>                                                    | <b>1</b>                                                     | <b>2</b>                                              |
| 40                                                          | 0                                                           | 0                                                            | 1                                                     |
| 42                                                          | 0                                                           | 0                                                            | 1                                                     |
| <b>45</b>                                                   | <b>2 (2)</b>                                                | <b>1 (1)</b>                                                 | <b>2</b>                                              |
| <b>51</b>                                                   | <b>2</b>                                                    | <b>1</b>                                                     | <b>2</b>                                              |
| <b>52</b>                                                   | <b>2</b>                                                    | <b>1</b>                                                     | <b>0</b>                                              |
| 53                                                          | 1 (1)                                                       | 0                                                            | 3                                                     |
| 54                                                          | 0                                                           | 1                                                            | 1                                                     |
| 55                                                          | 2 (1)                                                       | 4 (1)                                                        | 4 (1)                                                 |
| <b>56</b>                                                   | <b>1</b>                                                    | <b>1</b>                                                     | <b>2</b>                                              |
| <b>58</b>                                                   | <b>1</b>                                                    | <b>0</b>                                                     | <b>1</b>                                              |
| <b>59</b>                                                   | <b>1 (1)</b>                                                | <b>0</b>                                                     | <b>0</b>                                              |
| 61                                                          | 0                                                           | 1                                                            | 1                                                     |
| 62                                                          | 7 (2)                                                       | 7 (2)                                                        | 7 (1)                                                 |
| <b>66</b>                                                   | <b>3</b>                                                    | <b>3</b>                                                     | <b>2</b>                                              |
| 69                                                          | 1 (1)                                                       | 1                                                            | 0                                                     |
| 70                                                          | 2                                                           | 3                                                            | 2                                                     |
| 72                                                          | 4 (1)                                                       | 3 (1)                                                        | 3                                                     |
| 73                                                          | 1                                                           | 1                                                            | 1                                                     |
| 81                                                          | 0                                                           | 2                                                            | 2                                                     |
| 82                                                          | 3                                                           | 2                                                            | 0                                                     |
| 83                                                          | 1                                                           | 1                                                            | 1                                                     |
| 84                                                          | 2 (2)                                                       | 2 (1)                                                        | 1                                                     |
| 89                                                          | 2                                                           | 1                                                            | 3                                                     |
| Negative                                                    | 136                                                         | 135                                                          | 131                                                   |
| Unable to type                                              | 3                                                           | 4                                                            | 7                                                     |
| Beta globin positive                                        | 173                                                         | 173                                                          | 170                                                   |
| Mean beta globin in HPV<br>positive samples<br>(copies/5µL) | 2.77E+05                                                    | 2.18E+05                                                     | 8.94E+04                                              |
| Mean beta globin in HPV<br>negative samples<br>(copies/5µL) | 3.45E+05                                                    | 2.20E+05                                                     | 1.01E+05                                              |
| Positive for HPV ELISA                                      | 39                                                          | 38                                                           | 42                                                    |
